# Supplementary material
Source: PubMed Central journal article supplement (PMC5766391)
Supplement: NIHMS901983-supplement-supplement_1.pdf [file NIHMS901983-supplement-supplement_1.pdf]

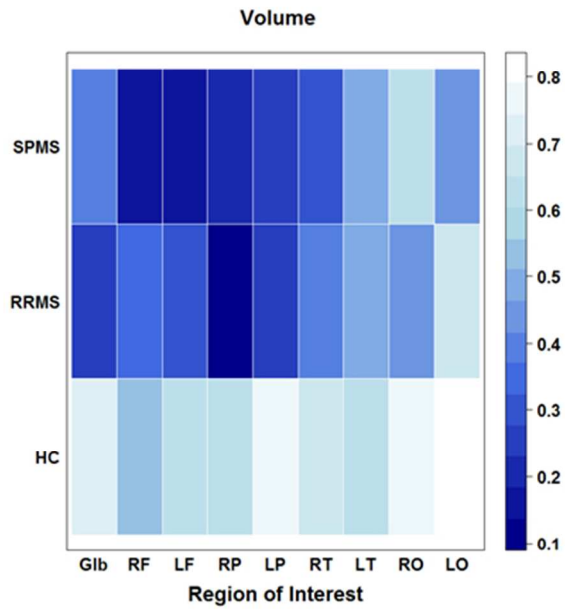

Supplementary Figure 1: Association between cGM and NAWM global and lobar volumes (cm3). Strength of p-value represented by the y-axis. Actual coefficients are provided in Table 4.

60x39mm (300 x 300 DPI)

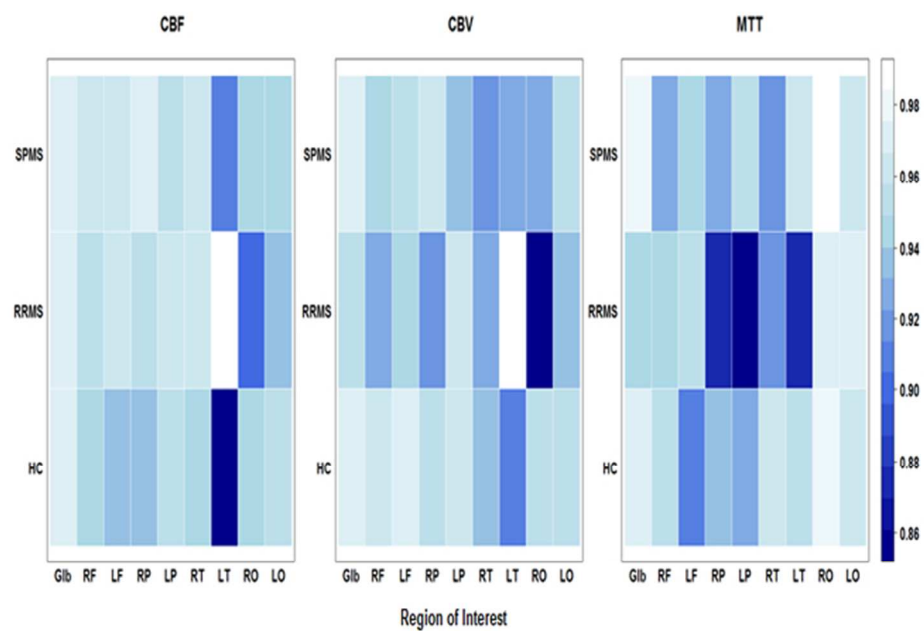

Supplementary Figure 2: Graphical depiction of strength of association between global and lobar NAWM and cGM perfusion. Strength of p-value represented by the y-axis. Actual coefficients are provided in Table 4. Units for CBF (ml/100g/m), CBV (ml/100g), MTT (seconds)

60x39mm (300 x 300 DPI)

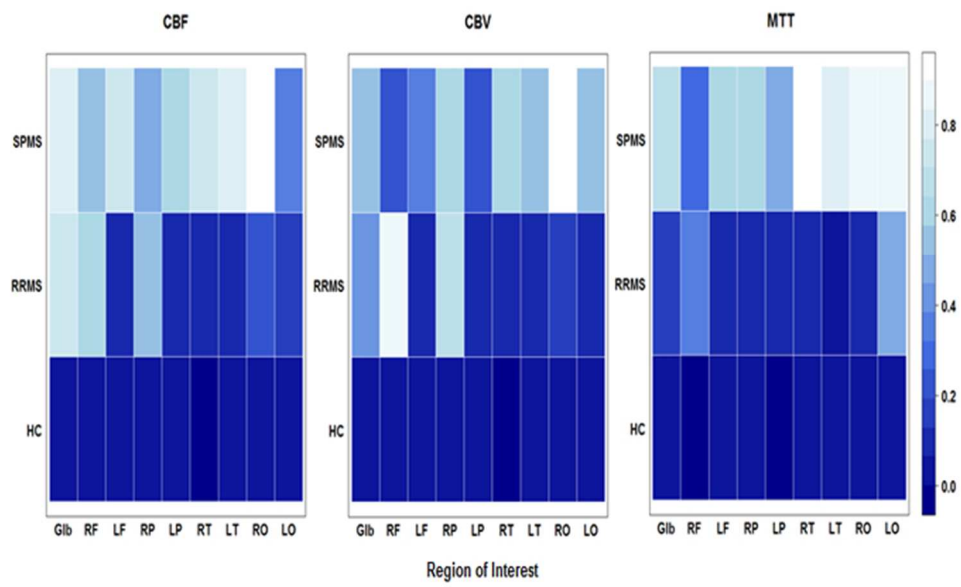

Supplementary Figure 3: Graphical depiction of strength of association between global and lobar T2h-I and cGM perfusion. Strength of p-value represented by the y-axis. Actual coefficients are provided in Table 4. Units for CBF (ml/100g/m), CBV (ml/100g), MTT (seconds)

60x39mm (300 x 300 DPI)

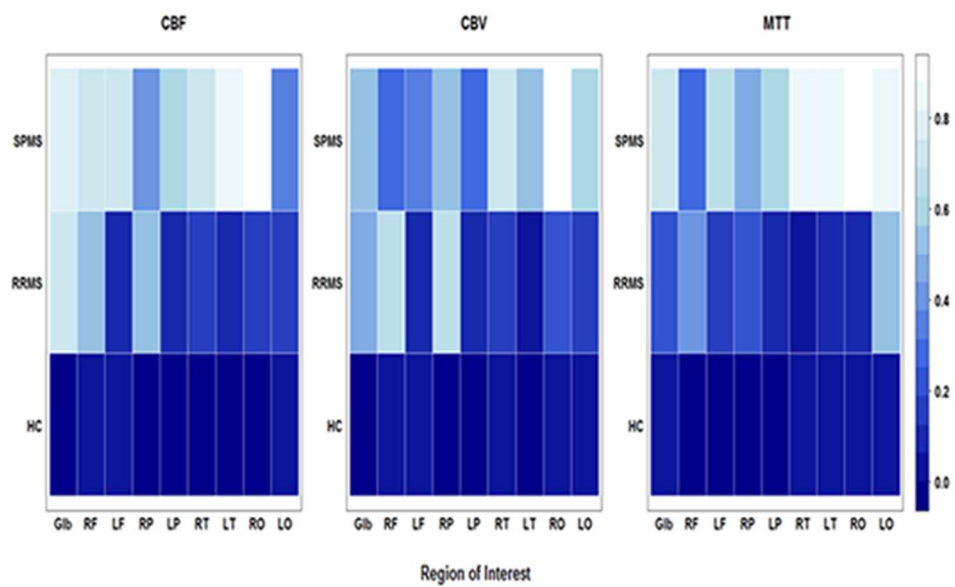

Supplementary Figure 4: Graphical depiction of strength of association between global and lobar T2h-I and NAWM perfusion. Strength of p-value represented by the y-axis. Actual coefficients are provided in Table 4.  
Units for CBF (ml/100g/m), CBV (ml/100g), MTT (seconds)

60x39mm (300 x 300 DPI)
